# Supplementary material
Source: publisher figshare collection journal article supplement (https://springernature.figshare.com/articles/dataset/_/13476867)
Supplement: Supplementary file 1 [file 1]

## 2 **Supplementary Information for**

### 3 **Urban Access Across the Globe: An International Comparison of Different Transport Modes**

4 **Hao Wu, Paolo Avner, Genevieve Boisjoly, Carlos K. V. Braga, Ahmed El-Geneidy, Jie Huang, Tamara Kerzhner, Brendan**  
5 **Murphy, Michał Niedzielski, Rafael H. M. Pereira, John P. Pritchard, Anson Stewart, Jiaoe Wang, David Levinson,**

6 **Hao Wu E-mail: [h.wu@sydney.edu.au](mailto:h.wu@sydney.edu.au)**

#### 7 **This PDF file includes:**

- 8     Supplementary text
- 9     Supplementary Figure 1 to 6
- 10    Supplementary Table 1
- 11    Supplementary References

## Supporting Information Text

### 1. Accessibility Data Sources

**Table S1. Cities Covered; in Alphabetical Order**

| Africa(2) |                 | Brazil(20)  |           | Canada(10) | China(7)   | Europe(18) |              | Oceania(11)  | United States(49) |                |  |
|-----------|-----------------|-------------|-----------|------------|------------|------------|--------------|--------------|-------------------|----------------|--|
| Douala    | Belem           | Sao Goncalo | Calgary   | Beijing    | Amsterdam  | Wroclaw    | Adelaide     | Atlanta      | Jacksonville      | Providence     |  |
| Nairobi   | Belo Horizonte  | Sao Luis    | Edmonton  | Guangzhou  | Bratislava |            | Auckland     | Austin       | Kansas City       | Raleigh        |  |
|           | Brasilia        | Sao Paulo   | Halifax   | Kunming    | Bucharest  |            | Brisbane     | Baltimore    | Las Vegas         | Richmond       |  |
|           | Campinas        |             | London    | Shanghai   | Budapest   |            | Canberra     | Birmingham   | Los Angeles       | Riverside      |  |
|           | Campo Grande    |             | Montreal  | Shenzhen   | Eindhoven  |            | Christchurch | Boston       | Louisville        | Sacramento     |  |
|           | Curitiba        |             | Ottawa    | Xiamen     | Gdansk     |            | Darwin       | Buffalo      | Miami             | Salt Lake City |  |
|           | Duque de Caxias |             | Quebec    | Xian       | Groningen  |            | Hobart       | Charlotte    | Milwaukee         | San Antonio    |  |
|           | Fortaleza       |             | Toronto   |            | Kielce     |            | Melbourne    | Chicago      | Minneapolis       | San Diego      |  |
|           | Goiania         |             | Vancouver |            | Krakow     |            | Perth        | Cincinnati   | Nashville         | San Francisco  |  |
|           | Guarulhos       |             | Winnipeg  |            | London     |            | Sydney       | Cleveland    | New Orleans       | San Jose       |  |
|           | Maceio          |             |           |            | Paris      |            | Wellington   | Columbus     | New York          | Seattle        |  |
|           | Manaus          |             |           |            | Rotterdam  |            |              | Dallas       | Oklahoma City     | St. Louis      |  |
|           | Natal           |             |           |            | The Hague  |            |              | Denver       | Orlando           | Tampa          |  |
|           | Porto Alegre    |             |           |            | Tilburg    |            |              | Detroit      | Philadelphia      | Virginia Beach |  |
|           | Recife          |             |           |            | Utrecht    |            |              | Hartford     | Phoenix           | Washington     |  |
|           | Rio de Janeiro  |             |           |            | Vienna     |            |              | Houston      | Pittsburgh        |                |  |
|           | Salvador        |             |           |            | Warsaw     |            |              | Indianapolis | Portland          |                |  |

Data from a total of 117 cities from 16 countries: Australia, Austria, Brazil, Cameroon, Canada, China, France, Hungary, Kenya, Netherlands, New Zealand, Poland, Slovakia, the United Kingdom, the United States, and Romania are collected in this comparison. [Table S1](#) provides a list of cities covered. African cities are grouped as ‘Africa’, and European cities as ‘Europe’ in later analysis, instead of using individual nationalities; Australian and New Zealand cities are grouped as ‘Oceania’.

**Africa -** Access by transit and walking are measured for Douala, Cameroon and Nairobi, Kenya. Because we were not able to obtain job count data for these two cities, the job numbers are estimated by redistributing the entire working population (1) (assuming 60% of the population in the workforce) to work locations, based on an index for the intensity of local business activities (2). The transit access to jobs are calculated using 8:00 am departure time.

**Brazil -** Access is measured for 20 Brazilian cities (3). Travel time estimates were calculated between centroids of hexagonal grid of 357 meters (short diagonal). Estimates for transit consider the median travel time of multiple departures every 15 minutes between 6am and 8am on a typical business day between September and October 2019. Travel times were estimated using OpenTripPlanner. A walking speed of 3.6 km/h and a cycling speed of 12 km/h are used. The employment data comes from the Annual Report on Social Information (RAIS), a dataset organized by the Brazilian Ministry of Labor and Employment. A notable amount of informal jobs are not captured by official records (4), so an underestimation of jobs, and therefore an underestimation of the access to jobs is likely.

**Canada -** Access measures for 10 Canadian cities are based on city administrative boundaries, and travel times are calculated between census tract centroids. Job numbers come from the census data; automobile travel times are estimates using the Google API for 8:00 AM departure time on Tuesday, March 14, 2017. The transit travel times estimated from GTFS data uses the same trip departure time. Access by transit and by automobile are included for Canadian cities.

**China -** City boundaries for the 7 Chinese cities are demarcated by ‘Major Urban Area’ (MUA) with ‘continuous high population density’ covering on average 77% of the population within the administrative boundaries. The city population numbers for Chinese cities correspond to the population within each MUA. The jobs and resident workers locations are based on the mobile phone data from the China Unicom (a mobile carrier) for November 2019, and the number of jobs and resident workers are inferred from the market share of the China Unicom (29.6%). The Gaode map API is used to estimate travel time between zones, for 8:00 am departure time on a Wednesday in November 2019. The accessibility is calculated at the resolution of 1 kilometer (0.62 mile) grids.

**Europe -** 18 European cities are covered in this paper. Automobile access is based on 2014 TomTom speed data (5) for Netherlands. Netherlands transit and automobile travel time are based on morning peak (6:00 am - 9:00 am) schedule and traffic condition. OpenStreetMap provides the road network for Paris and London; transit access is based on the median total travel time for trips departing between 7:30 and 8:30 am, calculated from OpenStreetMap and GTFS inputs following (6). For Paris, population inputs are 200-meter grid cells from the French National Institute of Statistics and Economic Studies, and job inputs are based on the 2019 SIRENE database (7). The London population and job data are from the 2011 UK census. The Warsaw, Wroclaw, Gdansk, Kielce, and Krakow data are based on aggregated transport zones using 8:00 am trip departure time and job numbers between 2015 to 2017; Bratislava, Bucharest, Budapest, Vienna use 2011 job numbers.

48 **Oceania -** Access measure for the 8 Australian cities and 3 New Zealand cities are based on census job numbers from the  
49 respective countries, and travel time estimations for departure time of 8:00 AM Wednesday (June 13, 2018 for Australia and  
50 Dec. 4, 2019 for New Zealand). Access by all four modes of transport: automobile, transit, walking and cycling are covered.  
51 The geographical boundaries of Australian cities are based on the Greater Capital City Statistical Areas, and the New Zealand  
52 cities on the Territorial Authority; both boundaries envelop the majority of commute ties with the urban core. The Australian  
53 cities are subdivided using 2016 Statistical Area Level 2 (SA2s) (8), and 2016 census is used for population and job numbers;  
54 subdivision of the New Zealand cities uses the 2013 areal units and 2013 census data for (9). The Australian access measure  
55 uses Google API for travel time estimates between SA2 zonal centroids; walking and cycling speeds are assumed to be 3 mph  
56 (4.8 km/h) and 12 mph (19.2 km/h) respectively by default, and adjusted by Google for terrain and travel distance. New  
57 Zealand automobile travel times are obtained from TomTom API, and transit, walking and cycling travel times are calculated  
58 using the OpenTripPlanner. A walking speed of 4.8 km/h and a cycling speed of 18 km/h are used.

59 **United States -** Travel time for the 49 US metropolitan statistical areas include 2017 automobile, transit, and cycling access,  
60 and 2014 walking access. Access measures are based on census block centroids. The US data comes from the Access Observatory  
61 at the University of Minnesota (10). Automobile uses a 8:00 am Wednesday morning as trip departure time, adjusted for traffic  
62 using loop detectors, and Tom Tom data (10); transit access uses transit schedules from GTFS data, and minutely averaged  
63 from 7:00 to 9:00 am, on a Wednesday schedule; walking access is calculated using the OpenStreetMap (10). Walking speed is  
64 assumed to be 5 km/h. Labor and employment comes from the 2015 (2012 for walking) US Census Bureau's Longitudinal  
65 Employer-Household Dynamics (LEHD) data (11).

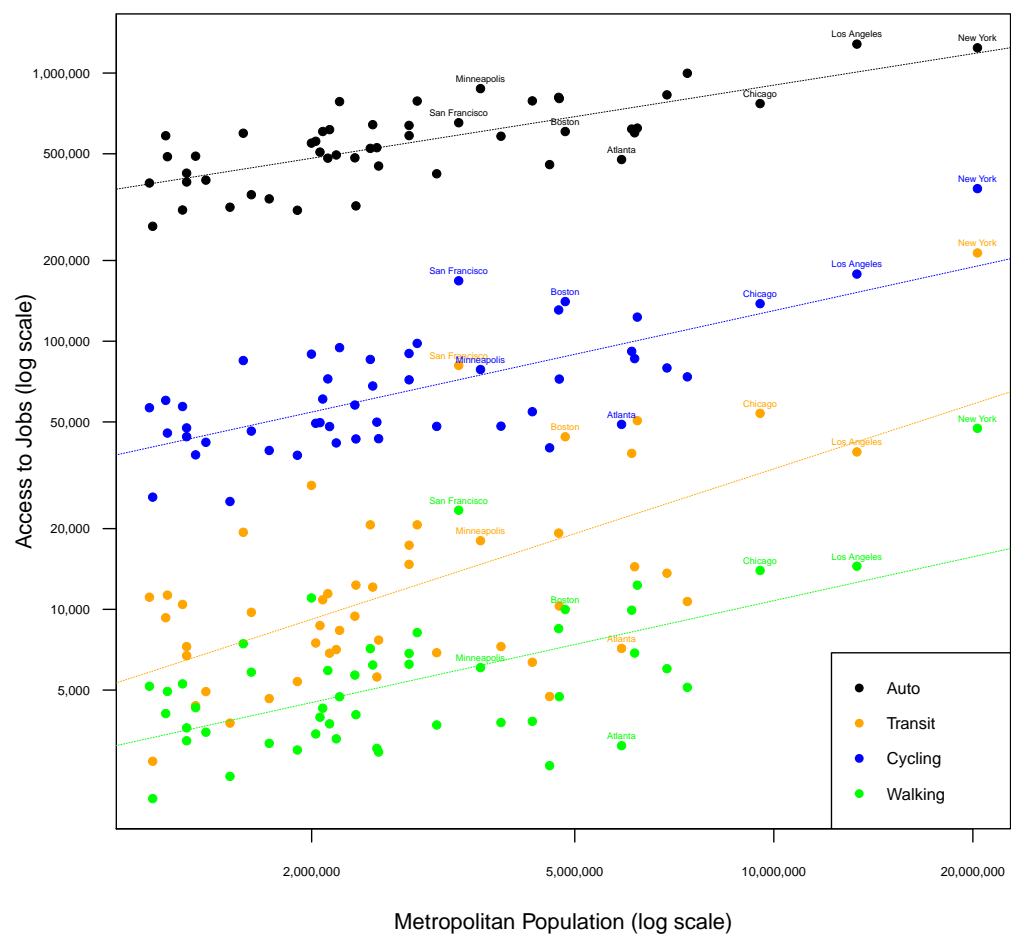

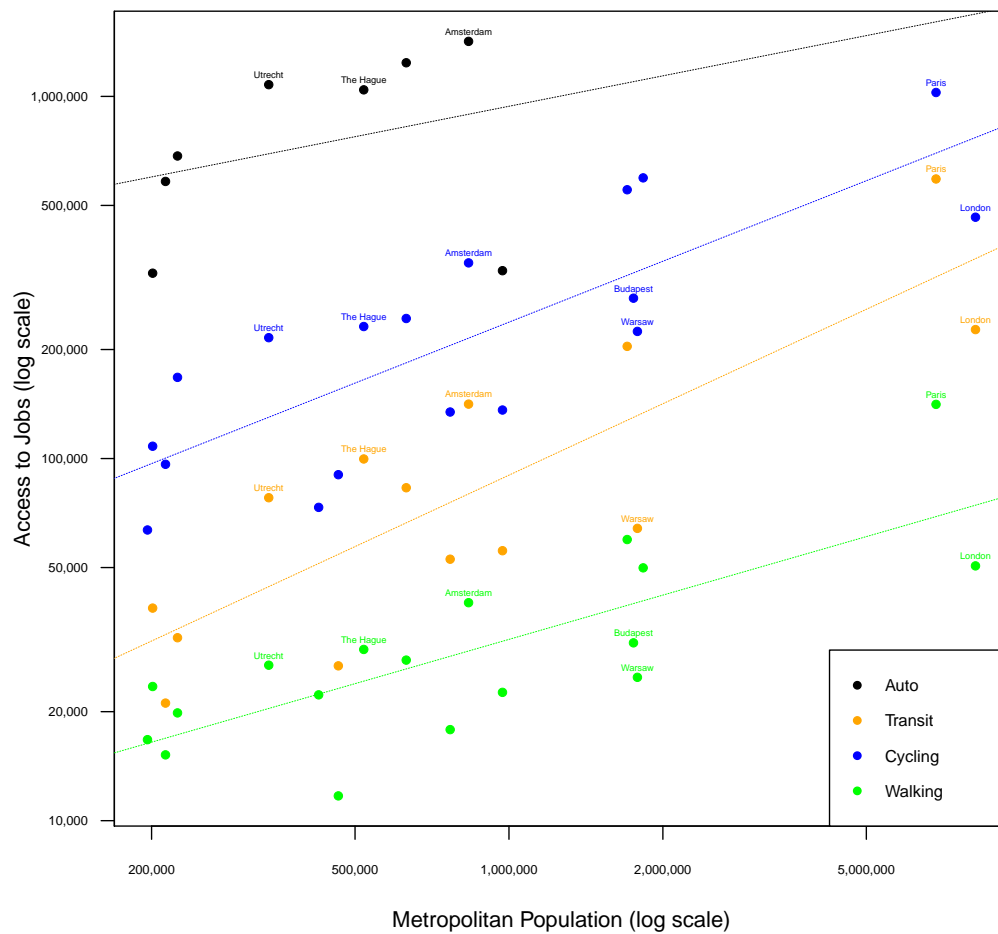

**SupplementaryFigure S2.** Access to Jobs by Modes of Transport in Europe

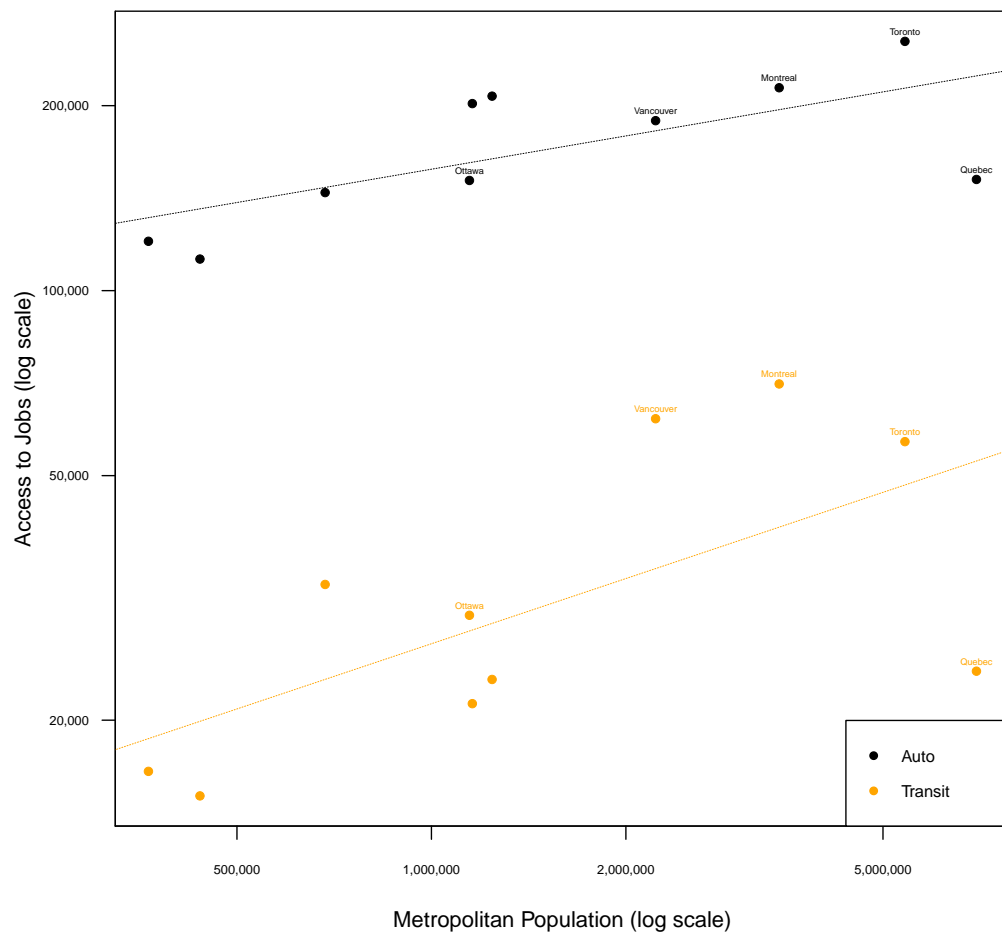

**SupplementaryFigure S3.** Access to Jobs by Modes of Transport in Canada

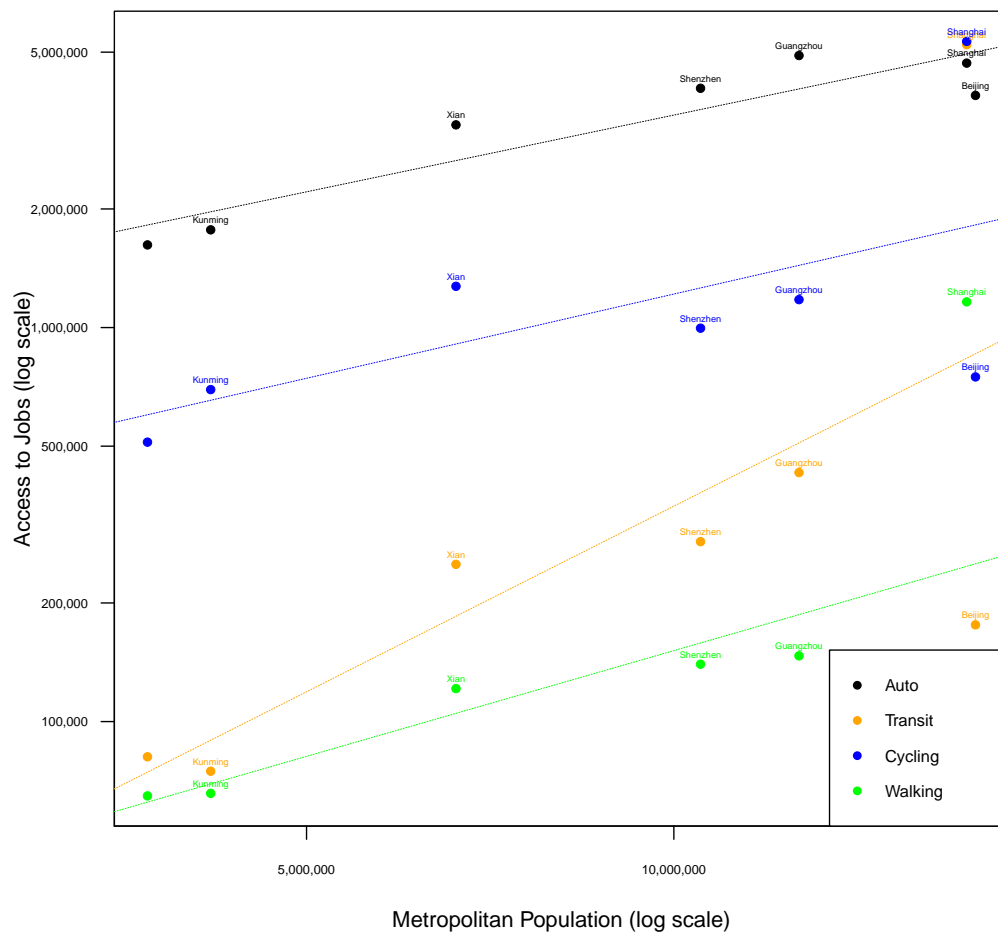

**SupplementaryFigure S4.** Access to Jobs by Modes of Transport in China

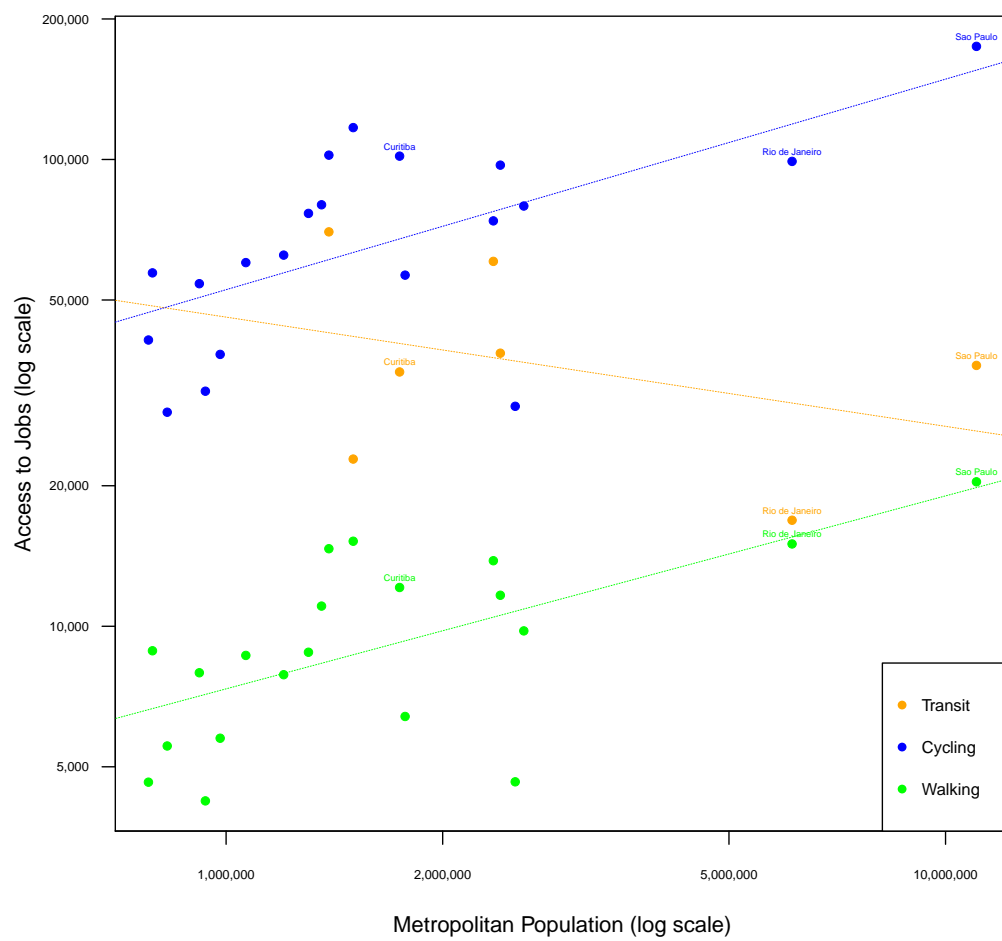

**SupplementaryFigure S5.** Access to Jobs by Modes of Transport in Brazil



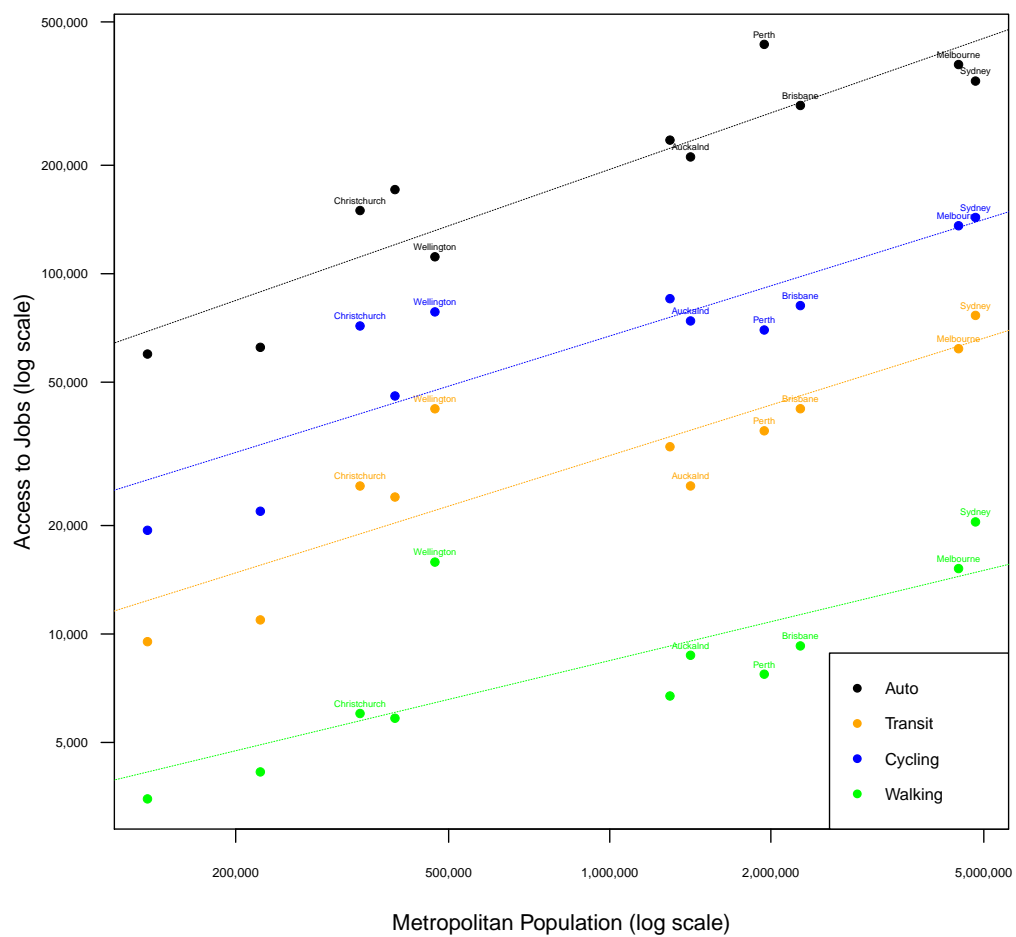

**SupplementaryFigure S6.** Access to Jobs by Modes of Transport in Oceania

Table S1. Global Comparison and Ranking of Access by City and by Mode; Cities Ranked Total Population

| City            | Abbr. | Country       | Population | 30-minute Access by Mode |           |           |           | Ranking (total number of cities) |          |              |           |           |
|-----------------|-------|---------------|------------|--------------------------|-----------|-----------|-----------|----------------------------------|----------|--------------|-----------|-----------|
|                 |       |               |            | Auto                     | Transit   | Walk      | Bike      | Pop.(117)                        | Auto(85) | Transit(100) | Walk(107) | Bike(105) |
| New York        | NYC   | United States | 20,320,876 | 1,241,973                | 213,407   | 47,338    | 370,753   | 1                                | 10       | 7            | 12        | 12        |
| Beijing         | PEK   | China         | 17,668,140 | 3,883,735                | 175,992   | 68,091    | 749,505   | 2                                | 4        | 9            | 6         | 6         |
| Shanghai        | PVG   | China         | 17,377,756 | 4,690,249                | 5,223,556 | 1,162,225 | 5,325,416 | 3                                | 2        | 1            | 1         | 1         |
| Los Angeles     | LAX   | United States | 13,353,907 | 1,282,378                | 38,647    | 14,490    | 178,007   | 4                                | 9        | 34           | 36        | 19        |
| Guangzhou       | CAN   | China         | 12,663,510 | 4,903,020                | 428,610   | 146,829   | 1,177,428 | 5                                | 1        | 3            | 2         | 3         |
| Sao Paulo       | GRU   | Brazil        | 11,039,463 | -                        | 36,211    | 20,394    | 174,709   | 6                                | -        | 39           | 26        | 20        |
| Shenzhen        | SZX   | China         | 10,516,429 | 4,048,766                | 286,226   | 139,854   | 996,439   | 7                                | 3        | 4            | 4         | 5         |
| Chicago         | CHI   | United States | 9,533,040  | 769,483                  | 53,831    | 13,965    | 138,051   | 8                                | 22       | 27           | 37        | 25        |
| London          | LCY   | Europe        | 8,173,940  | -                        | 227,080   | 475,539   | 463,959   | 9                                | -        | 6            | 10        | 11        |
| Dallas          | DAL   | United States | 7,399,662  | 998,369                  | 10,699    | 5,118     | 73,646    | 10                               | 14       | 74           | 77        | 57        |
| Quebec          | YQB   | Canada        | 6,976,500  | 151,692                  | 24,032    | -         | -         | 11                               | 77       | 49           | -         | -         |
| Houston         | HOU   | United States | 6,892,427  | 829,147                  | 13,639    | 6,008     | 79,485    | 12                               | 16       | 66           | 68        | 51        |
| Paris           | CDG   | Europe        | 6,843,111  | -                        | 591,617   | 141,135   | 1,025,302 | 13                               | -        | 2            | 3         | 4         |
| Xian            | XIY   | China         | 6,629,000  | 3,269,548                | 250,626   | 121,247   | 1,272,791 | 14                               | 5        | 5            | 5         | 2         |
| Washington      | DC    | United States | 6,216,589  | 623,387                  | 50,551    | 12,310    | 123,007   | 15                               | 27       | 29           | 39        | 30        |
| Miami           | MIA   | United States | 6,158,824  | 598,727                  | 14,419    | 6,872     | 86,122    | 16                               | 32       | 65           | 60        | 44        |
| Rio de Janeiro  | GIG   | Brazil        | 6,119,114  | -                        | 16,873    | 15,010    | 99,070    | 17                               | -        | 61           | 34        | 35        |
| Philadelphia    | PHI   | United States | 6,096,120  | 618,294                  | 38,185    | 9,929     | 91,685    | 18                               | 28       | 37           | 46        | 40        |
| Atlanta         | ATL   | United States | 5,884,736  | 475,950                  | 7,152     | 3,102     | 48,958    | 19                               | 48       | 87           | 101       | 80        |
| Toronto         | YYZ   | Canada        | 5,407,200  | 254,472                  | 56,794    | -         | -         | 20                               | 69       | 25           | -         | -         |
| Boston          | BOS   | United States | 4,836,531  | 605,308                  | 44,014    | 9,988     | 140,544   | 21                               | 31       | 31           | 45        | 24        |
| Sydney          | SYD   | Australia     | 4,823,991  | 342,597                  | 76,617    | 20,470    | 143,253   | 22                               | 59       | 16           | 25        | 23        |
| Phoenix         | PHX   | United States | 4,737,270  | 803,505                  | 10,290    | 4,725     | 72,251    | 23                               | 18       | 76           | 79        | 60        |
| Nairobi         | NBO   | Africa        | 4,735,000  | -                        | 59,342    | 22,124    | -         | 24                               | -        | 24           | 24        | -         |
| San Jose        | SJC   | United States | 4,727,357  | 811,889                  | 19,254    | 8,476     | 130,769   | 25                               | 17       | 58           | 53        | 29        |
| Riverside       | UCR   | United States | 4,580,670  | 455,652                  | 4,732     | 2,613     | 40,028    | 26                               | 49       | 96           | 105       | 94        |
| Melbourne       | MEL   | Australia     | 4,485,211  | 380,754                  | 61,932    | 15,192    | 135,879   | 27                               | 57       | 21           | 33        | 27        |
| Detroit         | DET   | United States | 4,313,002  | 787,536                  | 6,349     | 3,824     | 54,598    | 28                               | 19       | 92           | 90        | 75        |
| Kunming         | KMG   | China         | 4,172,752  | 1,770,296                | 74,815    | 65,740    | 695,971   | 29                               | 6        | 17           | 7         | 7         |
| St. Louis       | STL   | United States | 3,867,046  | 581,284                  | 7,268     | 3,784     | 48,217    | 30                               | 37       | 85           | 91        | 81        |
| Xiamen          | XMN   | China         | 3,703,521  | 1,621,125                | 81,403    | 64,777    | 511,925   | 31                               | 7        | 13           | 8         | 10        |
| Douala          | DLA   | Africa        | 3,663,000  | -                        | 45,386    | 45,333    | -         | 32                               | -        | 30           | 13        | -         |
| Minneapolis     | MSP   | United States | 3,600,618  | 875,049                  | 18,029    | 6,063     | 78,421    | 33                               | 15       | 59           | 66        | 52        |
| Montreal        | YUL   | Canada        | 3,453,700  | 213,894                  | 70,498    | -         | -         | 34                               | 71       | 18           | -         | -         |
| San Francisco   | SFO   | United States | 3,337,685  | 652,817                  | 81,215    | 23,428    | 168,044   | 35                               | 24       | 14           | 21        | 21        |
| Tampa           | TPA   | United States | 3,091,399  | 421,134                  | 6,891     | 3,705     | 48,126    | 36                               | 53       | 89           | 93        | 82        |
| Denver          | DEN   | United States | 2,888,227  | 786,345                  | 20,665    | 8,191     | 98,129    | 37                               | 20       | 56           | 54        | 36        |
| Baltimore       | BWI   | United States | 2,808,175  | 584,586                  | 17,344    | 6,850     | 71,781    | 38                               | 34       | 60           | 61        | 61        |
| Salt Lake City  | SLC   | United States | 2,807,338  | 637,938                  | 14,721    | 6,242     | 90,009    | 39                               | 26       | 64           | 64        | 42        |
| Salvador        | SAL   | Brazil        | 2,592,926  | -                        | -         | 9,775     | 79,494    | 40                               | -        | -            | 47        | 50        |
| Charlotte       | CLT   | United States | 2,525,305  | 450,125                  | 7,682     | 2,937     | 43,300    | 41                               | 50       | 83           | 104       | 89        |
| Brasilia        | BSB   | Brazil        | 2,522,601  | -                        | -         | 4,643     | 29,599    | 42                               | -        | -            | 81        | 100       |
| Orlando         | ORL   | United States | 2,509,831  | 526,926                  | 5,596     | 3,030     | 49,906    | 43                               | 40       | 93           | 102       | 77        |
| San Diego       | SAN   | United States | 2,473,974  | 642,021                  | 12,109    | 6,202     | 68,083    | 44                               | 25       | 68           | 65        | 64        |
| Portland        | PWM   | United States | 2,453,168  | 523,784                  | 20,666    | 7,137     | 85,511    | 45                               | 41       | 55           | 59        | 45        |
| Fortaleza       | FOR   | Brazil        | 2,405,275  | -                        | 38,465    | 11,653    | 97,250    | 46                               | -        | 36           | 42        | 37        |
| Belo Horizonte  | CNF   | Brazil        | 2,352,062  | -                        | 60,496    | 13,818    | 73,873    | 47                               | -        | 23           | 38        | 56        |
| Pittsburgh      | PIT   | United States | 2,333,367  | 319,641                  | 12,317    | 4,048     | 43,204    | 48                               | 63       | 67           | 88        | 90        |
| Sacramento      | SMF   | United States | 2,324,884  | 482,910                  | 9,430     | 5,687     | 57,812    | 49                               | 46       | 79           | 73        | 70        |
| Brisbane        | BNE   | Australia     | 2,270,800  | 293,131                  | 42,196    | 9,267     | 81,576    | 50                               | 67       | 32           | 48        | 48        |
| Vancouver       | YVR   | Canada        | 2,223,300  | 189,074                  | 61,885    | -         | -         | 51                               | 75       | 22           | -         | -         |
| Las Vegas       | LAS   | United States | 2,204,079  | 782,690                  | 8,350     | 4,721     | 94,625    | 52                               | 21       | 82           | 80        | 39        |
| Cincinnati      | CVG   | United States | 2,179,082  | 494,927                  | 7,080     | 3,290     | 41,750    | 53                               | 43       | 88           | 98        | 92        |
| Kansas City     | KS    | United States | 2,128,912  | 615,321                  | 6,864     | 3,742     | 48,058    | 54                               | 29       | 90           | 92        | 83        |
| Austin          | AUS   | United States | 2,115,827  | 481,581                  | 11,444    | 5,916     | 72,355    | 55                               | 47       | 69           | 69        | 59        |
| Columbus        | CMH   | United States | 2,078,725  | 605,435                  | 10,857    | 4,280     | 60,860    | 56                               | 30       | 73           | 84        | 67        |
| Cleveland       | CLE   | United States | 2,058,844  | 507,302                  | 8,703     | 3,961     | 49,704    | 57                               | 42       | 81           | 89        | 78        |
| Indianapolis    | IND   | United States | 2,028,614  | 556,698                  | 7,491     | 3,431     | 49,420    | 58                               | 38       | 84           | 97        | 79        |
| Seattle         | SEA   | United States | 1,998,463  | 547,963                  | 29,003    | 11,028    | 89,512    | 59                               | 39       | 45           | 44        | 43        |
| Perth           | PER   | Australia     | 1,943,858  | 433,116                  | 36,638    | 7,735     | 69,796    | 60                               | 51       | 38           | 57        | 63        |
| Nashville       | BNA   | United States | 1,903,045  | 307,872                  | 5,380     | 2,989     | 37,552    | 61                               | 66       | 94           | 103       | 98        |
| Bucharest       | OTP   | Europe        | 1,830,000  | -                        | -         | 49,914    | 595,760   | 62                               | -        | -            | 11        | 8         |
| Warsaw          | WAW   | Europe        | 1,783,321  | -                        | 64,153    | 24,884    | 224,453   | 63                               | -        | 20           | 19        | 17        |
| Manaus          | MAO   | Brazil        | 1,773,375  | -                        | -         | 6,409     | 56,528    | 64                               | -        | -            | 63        | 73        |
| Budapest        | BUD   | Europe        | 1,752,000  | -                        | -         | 30,980    | 277,248   | 65                               | -        | -            | 15        | 14        |
| Curitiba        | CWB   | Brazil        | 1,742,355  | -                        | 35,062    | 12,109    | 101,670   | 66                               | -        | 40           | 40        | 34        |
| Virginia Beach  | VB    | United States | 1,725,246  | 339,490                  | 4,649     | 3,165     | 39,133    | 67                               | 60       | 97           | 100       | 95        |
| Vienna          | VIE   | Europe        | 1,703,000  | -                        | 204,094   | 59,755    | 552,437   | 68                               | -        | 8            | 9         | 9         |
| Providence      | PVD   | United States | 1,621,122  | 351,809                  | 9,751     | 5,831     | 46,220    | 69                               | 58       | 77           | 71        | 85        |
| Milwaukee       | MKE   | United States | 1,576,236  | 596,519                  | 19,383    | 7,444     | 84,722    | 70                               | 33       | 57           | 58        | 47        |
| Jacksonville    | JAX   | United States | 1,504,980  | 316,042                  | 3,765     | 2,383     | 25,254    | 71                               | 64       | 99           | 106       | 103       |
| Recife          | REC   | Brazil        | 1,501,976  | -                        | 22,814    | 15,212    | 117,033   | 72                               | -        | 52           | 31        | 31        |
| Auckland        | AKL   | New Zealand   | 1,415,550  | 210,934                  | 25,761    | 8,729     | 73,950    | 73                               | 72       | 47           | 51        | 55        |
| Porto Alegre    | POA   | Brazil        | 1,389,410  | -                        | 69,973    | 14,660    | 102,172   | 74                               | -        | 19           | 35        | 33        |
| Oklahoma City   | OKC   | United States | 1,383,737  | 398,760                  | 4,936     | 3,482     | 41,976    | 75                               | 54       | 95           | 96        | 91        |
| Belem           | BEL   | Brazil        | 1,357,180  | -                        | -         | 11,047    | 79,980    | 76                               | -        | -            | 43        | 49        |
| Raleigh         | RDU   | United States | 1,335,079  | 489,859                  | 4,371     | 4,300     | 37,690    | 77                               | 44       | 98           | 83        | 97        |
| Goiania         | GYN   | Brazil        | 1,301,592  | -                        | -         | 8,798     | 76,650    | 78                               | -        | -            | 50        | 54        |
| Adelaide        | ADL   | Australia     | 1,295,714  | 234,902                  | 33,095    | 6,729     | 85,267    | 79                               | 70       | 42           | 62        | 46        |
| Richmond        | RIC   | United States | 1,294,204  | 392,485                  | 6,719     | 3,615     | 44,048    | 80                               | 55       | 91           | 94        | 88        |
| Louisville      | SDF   | United States | 1,293,953  | 423,448                  | 7,263     | 3,236     | 47,502    | 81                               | 52       | 86           | 99        | 84        |
| New Orleans     | MSY   | United States | 1,275,762  | 308,564                  | 10,429    | 5,274     | 57,088    | 82                               | 65       | 75           | 75        | 72        |
| Calgary         | YYC   | Canada        | 1,241,300  | 207,264                  | 23,298    | -         | -         | 83                               | 73       | 51           | -         | -         |
| Hartford        | BDL   | United States | 1,210,259  | 487,649                  | 11,300    | 4,944     | 45,444    | 84                               | 45       | 70           | 78        | 87        |
| San Antonio     | SAT   | United States | 1,203,105  | 583,812                  | 9,306     | 4,087     | 60,172    | 85                               | 35       | 80           | 87        | 68        |
| Guarulhos       | GUA   | Brazil        | 1,202,298  | -                        | -         | 7,875     | 62,396    | 86                               | -        | -            | 56        | 66        |
| Edmonton        | YEG   | Canada        | 1,156,900  | 201,568                  | 21,279    | -         | -         | 87                               | 74       | 53           | -         | -         |
| Birmingham      | BHM   | United States | 1,149,807  | 268,251                  | 2,713     | 1,969     | 26,215    | 88                               | 68       | 100          | 107       | 102       |
| Ottawa          | YOW   | Canada        | 1,145,100  | 151,116                  | 29,631    | -         | -         | 89                               | 78       | 44           | -         | -         |
| Buffalo         | BUF   | United States | 1,136,856  | 389,028                  | 11,101    | 5,167     | 56,477    | 90                               | 56       | 71           | 76        | 74        |
| Campinas        | VCP   | Brazil        | 1,065,137  | -                        | -         | 8,661     | 60,132    | 91                               | -        | -            | 52        | 69        |
| Sao Luis        | SLZ   | Brazil        | 981,172    | -                        | -         | 5,757     | 38,236    | 92                               | -        | -            | 72        | 96        |
| Wroclaw         | WRO   | Europe        | 971,244    | 330,210                  | 55,659    | 22,613    | 136,140   | 93                               | 61       | 26           | 22        | 26        |
| Sao Goncalo     | QSD   | Brazil        | 935,758    | -                        | -         | 4,226     | 31,886    | 94                               | -        | -            | 85        | 99        |
| Maceio          | MCZ   | Brazil        | 917,872    | -                        | -         | 7,951     | 54,188    | 95                               | -        | -            | 55        | 76        |
| Amsterdam       | AMS   | Europe        | 833,624    | 1,419,003                | 141,369   | 39,996    | 346,991   | 96                               | 8        | 10           | 14        | 13        |
| Duque de Caxias | DDC   | Brazil        | 828,198    | -                        | -         | 5,541     | 28,747    | 97                               | -        | -            | 74        | 101       |
| Natal           | NAT   | Brazil        | 790,017    | -                        | -         | 8,862     | 57,158    | 98                               | -        | -            | 49        | 71        |
| Campo Grande    | CGR   | Brazil        | 779,885    | -                        | -         | 4,635     | 41,048    | 99                               | -        | -            | 82        | 93        |
| Krakow          | KRK   | Europe        | 767,348    | -                        | 52,733    | 17,843    | 134,432   | 100                              | -        | 28           | 28        | 28        |
| Winnipeg        | YWG   | Canada        | 684,600    | 144,413                  | 33,259    | -         | -         | 101                              | 80       | 41           | -         | -         |
| Rotterdam       | RTM   | Europe        | 629,606    | 1,238,582                | 83,064    | 27,761    | 243,655   | 102                              | 11       | 12           | 17        | 15        |
| The Hague       | EHGV  | Europe        | 519,988    | 1,042,759                | 99,730    | 29,710    | 231,517   | 103                              | 13       | 11           | 16        | 16        |

|              |      |             |         |           |        |        |         |     |    |    |    |     |
|--------------|------|-------------|---------|-----------|--------|--------|---------|-----|----|----|----|-----|
| Wellington   | WLG  | New Zealand | 471,315 | 111,423   | 42,177 | 15,833 | 78,351  | 104 | 83 | 33 | 30 | 53  |
| Gdansk       | GDN  | Europe      | 463,754 | -         | 26,766 | 11,708 | 90,241  | 105 | -  | 46 | 41 | 41  |
| London       | YXU  | Canada      | 438,200 | 112,571   | 15,061 | -      | -       | 106 | 82 | 63 | -  | -   |
| Bratislava   | BTS  | Europe      | 424,428 | -         | -      | 22,257 | 73,315  | 107 | -  | -  | 23 | 58  |
| Canberra     | CBR  | Australia   | 396,857 | 171,210   | 24,000 | 5,837  | 45,782  | 108 | 76 | 50 | 70 | 86  |
| Halifax      | YHZ  | Canada      | 364,700 | 120,327   | 16,511 | -      | -       | 109 | 81 | 62 | -  | -   |
| Christchurch | CHC  | New Zealand | 341,469 | 149,783   | 25,753 | 6,016  | 71,609  | 110 | 79 | 48 | 67 | 62  |
| Utrecht      | UTC  | Europe      | 338,967 | 1,077,662 | 77,956 | 26,877 | 215,680 | 111 | 12 | 15 | 18 | 18  |
| Eindhoven    | EIN  | Europe      | 224,755 | 684,701   | 32,006 | 19,845 | 167,570 | 112 | 23 | 43 | 27 | 22  |
| Hobart       | HBA  | Australia   | 222,356 | 62,479    | 10,943 | 4,142  | 21,917  | 113 | 84 | 72 | 86 | 104 |
| Tilburg      | EBHK | Europe      | 212,941 | 582,446   | 21,121 | 15,197 | 96,425  | 114 | 36 | 54 | 32 | 38  |
| Groningen    | GRQ  | Europe      | 200,952 | 324,987   | 38,645 | 23,471 | 108,158 | 115 | 62 | 35 | 20 | 32  |
| Kielce       | EPKA | Europe      | 196,335 | -         | -      | 16,741 | 63,501  | 116 | -  | -  | 29 | 65  |
| Darwin       | DRW  | Australia   | 136,828 | 59,853    | 9,521  | 3,486  | 19,403  | 117 | 85 | 78 | 95 | 105 |

## 68 References

- 69 1. Central Intelligence Agency (2020) *Major Urban Areas - Population*. (CIA Library).
- 70 2. Peralta-Quiros T, Kerzhner T, Avner P (2019) Exploring accessibility to employment opportunities in African cities: A  
71 first benchmark. *World Bank Policy Research Working Paper* August(8971):1–42.
- 72 3. Pereira RHM, Braga CKV, Serra B, Nadalin V (2019) Desigualdades socioespaciais de acesso a oportunidades nas cidades  
73 Brasileiras, 2019. *Texto para Discussão IPEA* 2535.
- 74 4. Boisjoly G, Serra B, Oliveira GT, El-Geneidy A (2019) Inequity in transit: Evaluating public transport distribution  
75 through accessibility measurements in São Paulo, Rio de Janeiro, Curitiba and Recife, Brazil. *Paper presented at the 98th*  
76 *Annual Meeting of the Transportation Research Board, Washington D.C., USA*.
- 77 5. Pritchard JP, Tomasiello DB, Giannotti M, Geurs K (2019) Potential impacts of bike-and-ride on job accessibility and  
78 spatial equity in São Paulo, Brazil. *Transportation Research part A: Policy and Practice* 121:386–400.
- 79 6. Conway MW, Byrd A, van Eggermond M (2018) Accounting for uncertainty and variation in accessibility metrics for  
80 public transport sketch planning. *Journal of Transport and Land Use* 11(1):541–558.
- 81 7. Quest C (2019) *2019 SIRENE database*. (OpenStreetMap France).
- 82 8. Hao Wu DL (2019) *Access Across Australia*. (TransportLab).
- 83 9. New Zealand Government (2013) *2013 Census*. (New Zealand Government).
- 84 10. Accessibility Observatory (2017) *Access Across America*. (University of Minnesota).
- 85 11. United States Census Bureau (2015) *Longitudinal Employer Household Dynamics data*. (U.S. Department of Commerce).
